# Supplementary material for: Effect of microcapsules partially filled with viscoelastic acrylate polymer on damping behaviours of epoxy resin
Source: Royal Society of Chemistry journal article supplement (doi:10.1039/c9nj01143a), 2019-01-01
Supplement: c9nj01143a1.pdf [file c9nj01143a1.pdf]

## New Journal of Chemistry

### Electronic Supplementary Material

# Effect of microcapsules partially filled with viscoelastic acrylate polymer on damping behaviours of epoxy resin

*Xiaoyu Shi<sup>a</sup>, Chenglong Liu<sup>a</sup>, Kexin Li<sup>a</sup>, Zuosen Shi<sup>a</sup> and Zhanchen Cui<sup>\*ab</sup>*

- a. State Key Laboratory of Supramolecular Structure and Materials, Jilin University, Changchun 130012, People's Republic of China.
- b. Department of Chemistry and Pharmacy, Zhuhai College of Jilin University, Zhuhai 519041, People's Republic of China

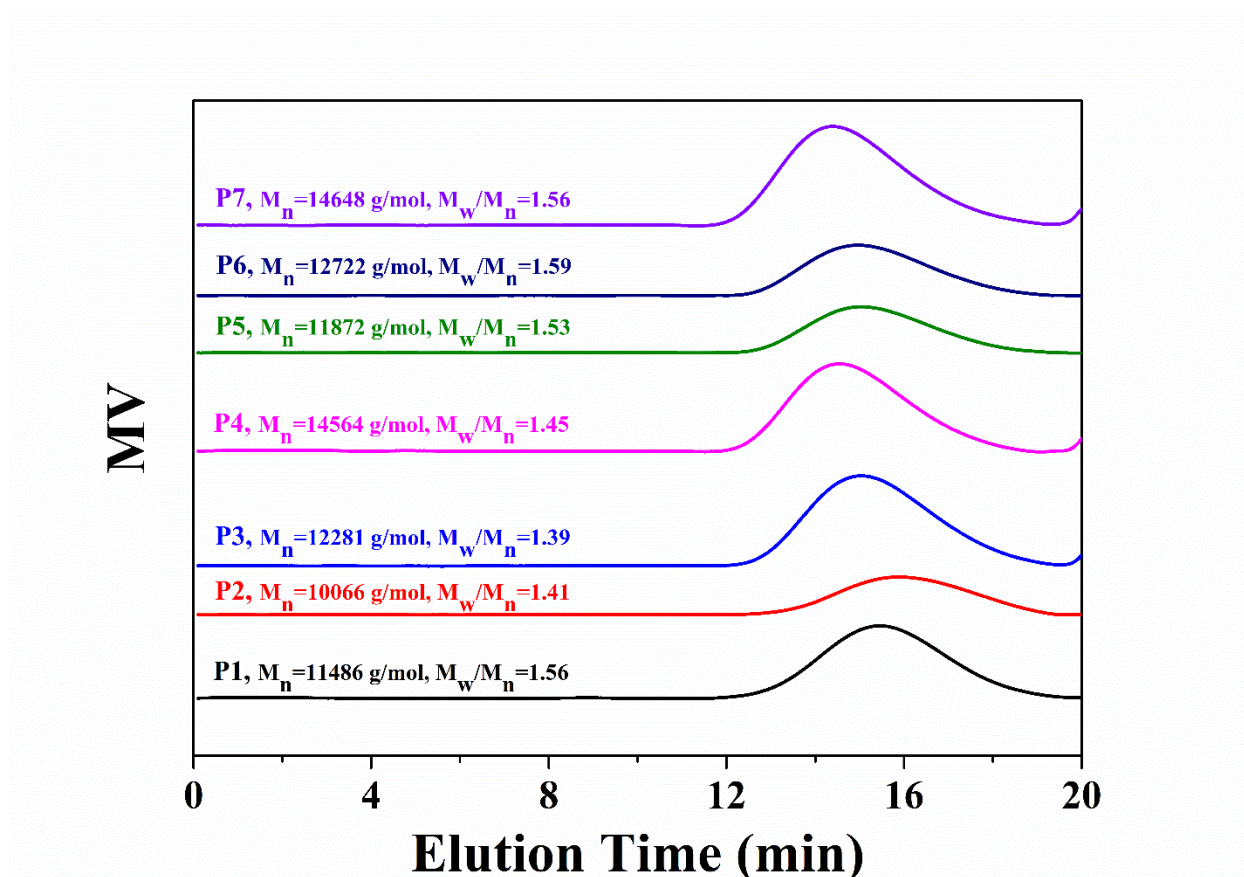

**Figure S1** GPC curves of acrylate polymers P1-P7

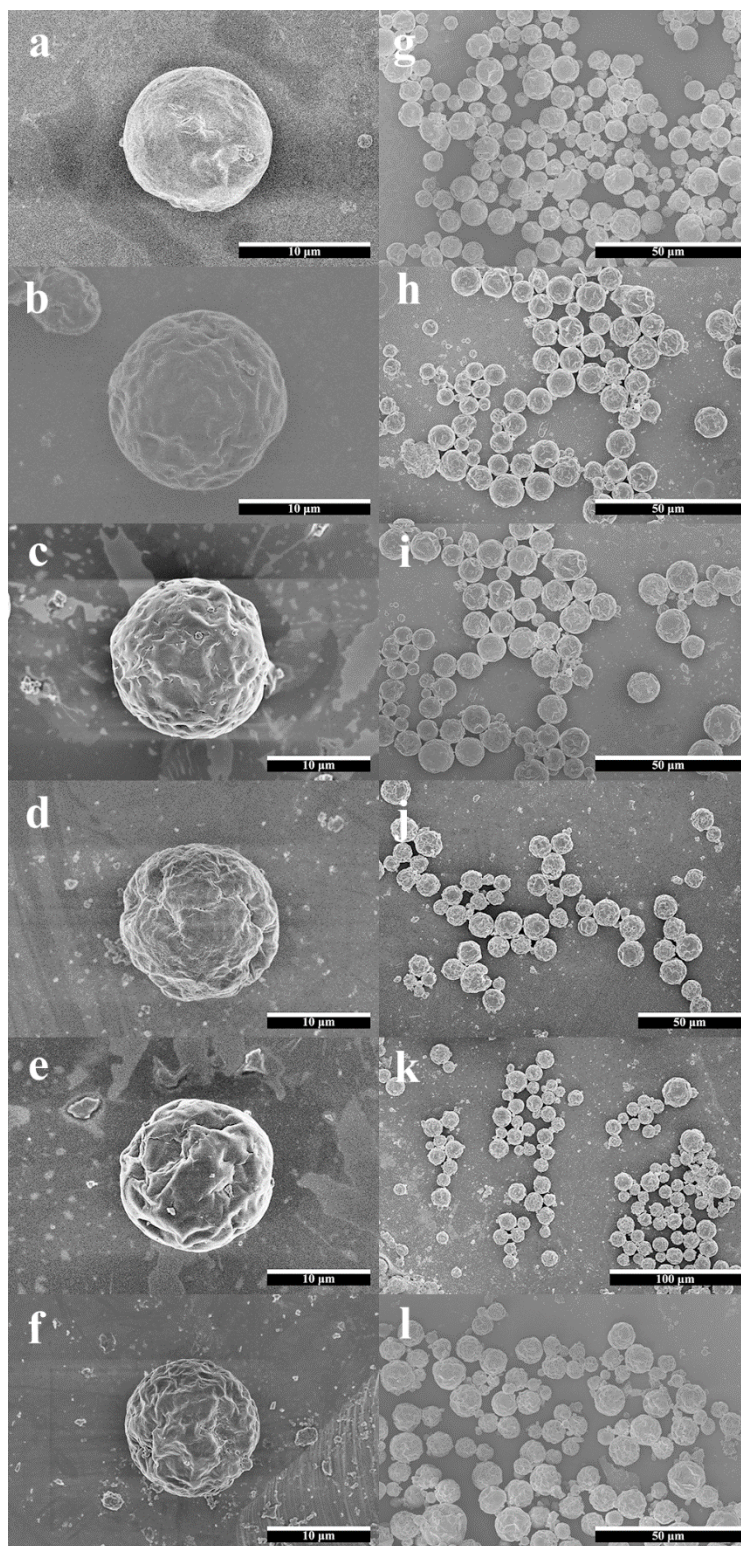

**Figure S2** SEM photographs of microcapsules MP60-1, MP60-3, MP60-4, MP60-5, MP60-6 and MP60-7. a-f) at high amplification. g-l) at low amplification.
